# Supplementary material
Source: publisher figshare collection journal article supplement (https://acs.figshare.com/ndownloader/files/5799696)
Supplement: Supplementary file 1 [file 5799696]

Supporting Information

*of*

Carbon Dots Decorated Carbon Nitride  
Nanoparticles for Enhanced Photodynamic  
Therapy against Hypoxic Tumor *via* Water  
Splitting

*Di-Wei Zheng<sup>1,2,#</sup>, Bin Li<sup>1,#</sup>, Chu-Xin Li<sup>1</sup>, Jin-Xuan Fan<sup>1</sup>, Qi Lei<sup>1</sup>, Cao Li<sup>2</sup>, Zushun Xu<sup>2</sup>,*

*Xian-Zheng Zhang<sup>1,\*</sup>*

<sup>1</sup> Key Laboratory of Biomedical Polymers of Ministry of Education, Institute for  
Advanced Studies (IAS), Department of Chemistry, Wuhan University, Wuhan  
430072, P. R. China.

<sup>2</sup> Hubei Collaborative Innovation Center for Advanced Organic Chemical Materials,  
Key Laboratory for the Green Preparation and Application of Functional Materials of  
Ministry of Education, Hubei University, Wuhan, Hubei 430062, P. R. China

\* Corresponding author. Email address: [xz-zhang@whu.edu.cn](mailto:xz-zhang@whu.edu.cn)

<sup>#</sup> These authors contributed equally to this work.

## METHODS

**Materials.** Citric acid, urea, N, N-dimethyl formamide (DMF), piperidine, sodium hydrosulfite, triisopropylsilane (TIS) and diisopropylethylamine (DIEA) were purchased from Shanghai Reagent Chemical Co. Fmoc-NH<sub>2</sub>-PEG<sub>8</sub>-COOH was purchased from Zhoubei Technology Co. Ltd. (Hangzhou, China). Trifluoroacetic acid (TFA) and protoporphyrin IX (PpIX) were purchased from Aladdin Industrial Corporation. N-(9-Fluorenylmethoxycarbonyl) (Fmoc) protected amino acids Fmoc-Arg(Pbf)-OH, Fmoc-Gly-OH and Fmoc-Asp(OtBu)-OH, o-Benzotriazol-1-yl-N,N,N',N'-tetramethyluronium hexafluorophosphate (HBTU) and 1-Hydroxybenzotriazole (HOBt) were purchased from GL biochem (Shanghai) Ltd. 2',7'-Dichlorofluorescein diacetate (DCFH-DA) was purchased from Beyotime Ltd. ROS-ID™ hypoxia/oxidative stress detection kit was purchased from Enzo Life Sciences Inc. CD31, CA9 and HIF- $\alpha$  antibodies were purchased from Abcam Inc.

**Characterization.** Transmission electron microscopy (TEM) images were obtained on a JEM-2100 (JEOL) transmission electron microscope. FT-IR spectrum was recorded on a Spectrum Two FT-IR Spectrophotometer (Perkin-Elmer). Zeta potential and particle size were measured by a zeta sizer (Nano ZS, Malvern Instruments). Powder X-ray diffraction (XRD) analysis was performed by using a Rigaku MiniFlex 600 X-ray diffractometer with Cu-K $\alpha$  ( $\lambda$  = 1.5418 Å). Thermogravimetric analysis (TGA) was performed on a Pyris1 thermogravimetric analyser (Perkin-Elmer) under a nitrogen flow at a heating rate of 10 °C min<sup>-1</sup>. Fourier transform-infrared spectroscopy (FT-IR) of samples were performed by using an Avatar 360 FT-IR spectrophotometer (PerkinElmer). Confocal laser scanning microscope (CLSM) images were obtained on a C1-Si (Nikon) confocal laser scanning microscope. Small animals fluorescence imaging was performed

with a living image IVIS® spectrum (Perkin-Elmer). CT scanning was performed in Quantum FX microCT (Perkin-Elmer).

**O<sub>2</sub> Generation of CCN.** Herein, sodium hydrosulfite was used to produce deoxygenated PBS. Then, 50 mg of CCN or C<sub>3</sub>N<sub>4</sub> was dispersed in 25 mL of deoxygenated PBS. After that, 10 mL of liquid paraffin was added to isolate deoxygenated PBS and air. The solution was illuminated under a laser light (630 nm He-Ne laser, 200 mW cm<sup>-2</sup>). A DOG-3082 oxygen dissolving meter was used to measure the O<sub>2</sub> generation in real-time.

**ROS Generation of PCCN.** First, DCFH-DA was converted to DCFH according to the previous report.<sup>S1</sup> Briefly, 0.5 mL of 1 mM DCFH-DA in ethanol was added to 2 mL of 0.01 N NaOH. Then, the solution was stirred at room temperature for 30 min. The hydrolysate was then neutralized with 10 mL of PBS at pH 7.4, and stored on ice until use. Then, 60 µL of DCFH solution was added in 3 mL of PpIX or PCCN (with a PpIX concentration of 10 mg/L) contained deoxygenated PBS or normal PBS. The solution was illuminated under a laser light (630 nm He-Ne laser, 40 mW cm<sup>-2</sup>). Emission spectra of various solutions were recorded with a fluorescence spectrophotometer.

***In Vivo* and *ex Vivo* Fluorescence Imaging.** The fluorescence imaging was performed on 4T1 tumor bearing mice. 200 µL of PCCN (with a PpIX concentration of 2.5 mg/kg) was *i.v.* injected into mice. Then, mice were imaged at different time point (Pre, 1, 2, 3, 4, 8, 12, 24, 36 and 48 h) with an excitation wavelength of 620 nm and emission wavelength of 680 nm. For the 3D fluorescence image, transillumination fluorescent model was performed with a living image IVIS® spectrum (Perkin-Elmer) with an excitation wavelength of 620 nm and emission wavelength of 680 nm. Then, the fluorescence signal was under a 3D

reconstitution program. CT scanning was performed to obtain structural informations of mice with a Quantum FX microCT (Perkin-Elmer). 3D CT mice structural informations and 3D fluorescence signal were overlayed in IVIS® spectrum software.

**Western Blot Assay.** 4T1 cells and MCF-7 cells were lysed and collected. Then, lysate was treated with 50  $\mu$ L of RIPA buffer and resuspended in 50  $\mu$ L of SDS buffer with 1%  $\beta$ -mercaptoethanol. Then the samples were heated for 5 min and separated on a 10% SDS-PAGE (15  $\mu$ L per lane). After electrophoresis, proteins were transferred to a PVDF membrane (Millipore). The PVDF membranes were then blocked in PBS with 5% skim milk for 1 h. Intracellular  $\alpha$ v $\beta$ 3 (Bioss) was detected. The membranes were incubated with the  $\alpha$ v $\beta$ 3 antibody (Bioss) rabbit anti-mice antibody (1:2000 dilution) overnight at 4 °C and then with the secondary antibody HRP labeled goat antirabbit IgG (1:3000 dilution, KPL) for 1 h.  $\alpha$ v $\beta$ 3 was monitored by enhanced chemiluminescence. GAPDH (Abcam, Rabbit) was employed as protein loading control.

## References

S1. Yuan, Y.; Liu, J.; Liu, B. Conjugated-Polyelectrolyte-Based Polyprodrug: Targeted and Image-Guided Photodynamic and Chemotherapy with On-Demand Drug Release upon Irradiation with a Single Light Source. *Angew. Chem. Int. Ed.* **2014**, *53*, 7163-7168.

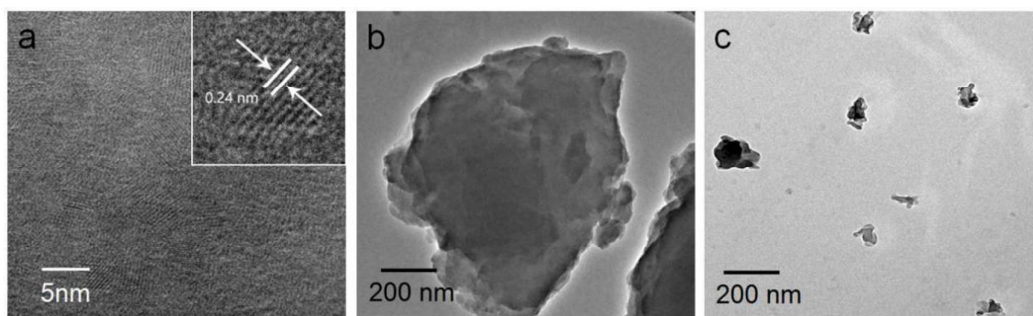

**Figure S1.** TEM images of (a) carbon dots; (b) CCN composite and (c) PCCN nanoparticles produced by a ball-milling process.

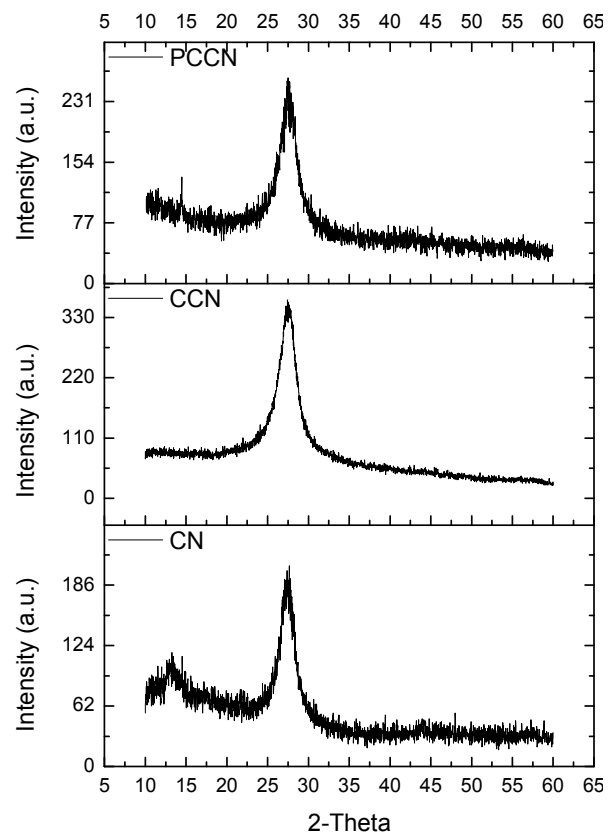

**Figure S2.** XRD spectrum of PCCN, CCN and  $C_3N_4$ .

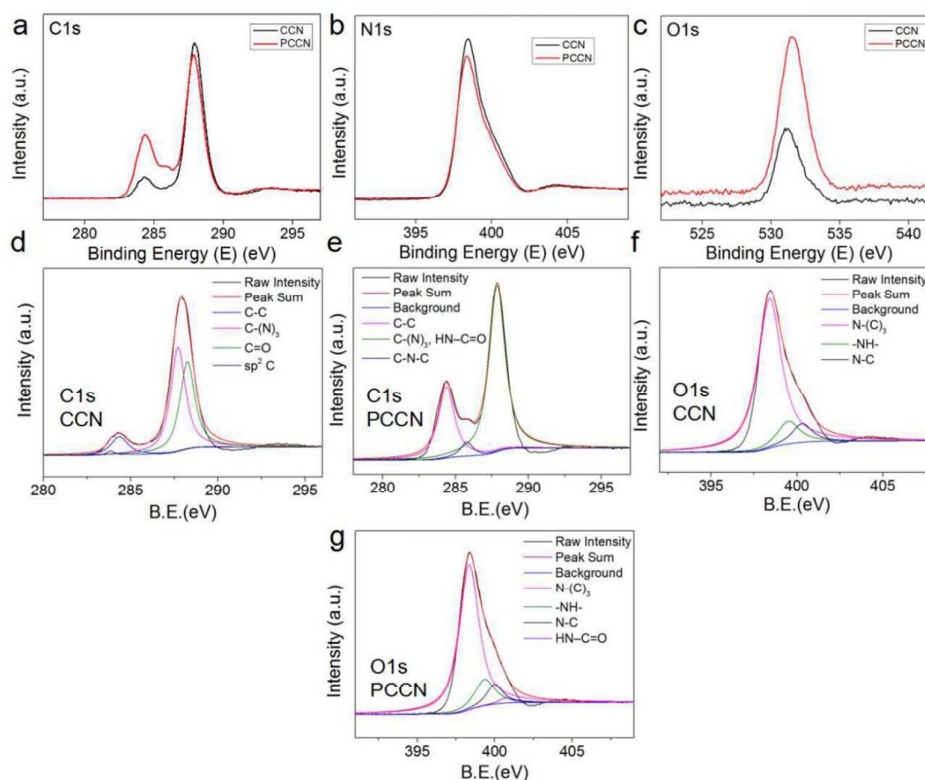

**Figure S3.** (a) XPS spectrum for C1s orbital of PCCN and CCN; (b) XPS spectrum for N1s orbital of PCCN and CCN; (c) XPS spectrum for O1s orbital of PCCN and CCN (d) XPS de-convoluted spectra for the C1s orbitals of CCN, in which 283.8, 284.4, 287.7 and 288.3 eV represent  $sp^2$  C, C-C, C-(N)<sub>3</sub> and C=O, respectively; (e) XPS de-convoluted spectra for the C1s orbitals of PCCN, in which 284.4, 285.8 and 287.9 eV represent C-C, C-N-C and C-(N)<sub>3</sub> together with HN-C=O, respectively; (f) XPS de-convoluted spectra for the N1s orbitals of CCN, in which 398.4, 399.5, and 400.3 eV represent N-(C)<sub>3</sub>, -NH-, and N-C, respectively; (g) XPS de-convoluted spectra for the N1s orbitals of PCCN, in which 398.4, 399.4, 400.0 and 400.7 eV represent N-(C)<sub>3</sub>, -NH-, N-C and HN-C=O, respectively.

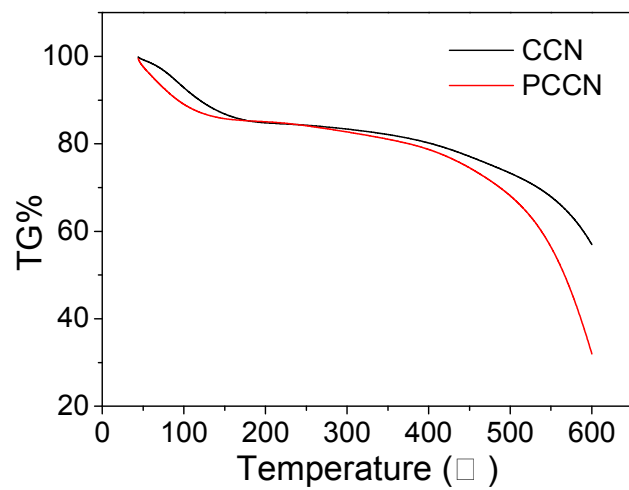

**Figure S4.** Thermogravimetric analysis of CCN and PCCN.



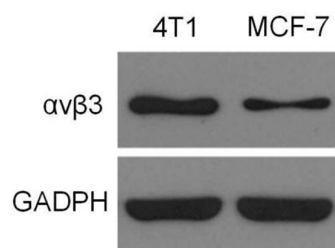

**Figure S5.** Western blot assay of  $\alpha v \beta 3$  level in 4T1 cells and MCF-7 cells.

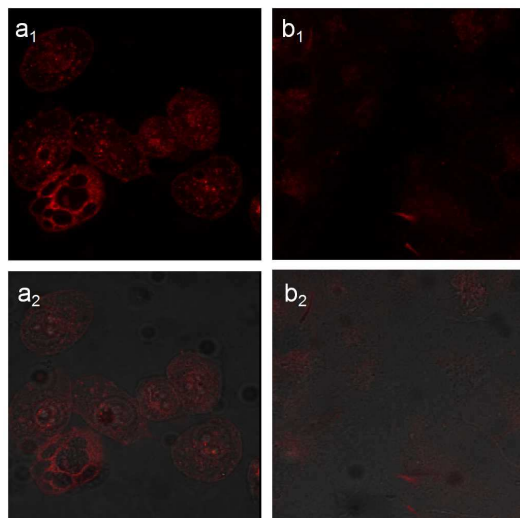

**Figure S6.** CLSM images of (a) 4T1 cells and (b) MCF-7 cells after 4 h of PCCN treatment (1: Red fluorescence; 2: Merged).

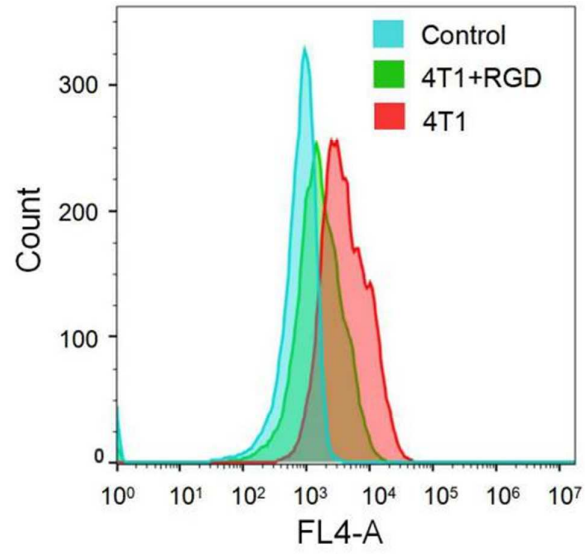

**Figure S7.** Flow cytometry analysis of 4T1 cells treated with PCCN in the presence and in the absence of free RGD.

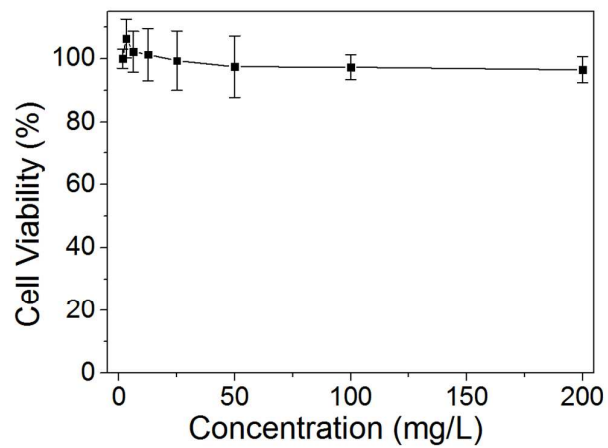

**Figure S8.** Cell viability assay of PCCN in 4T1 cells without laser irradiation.

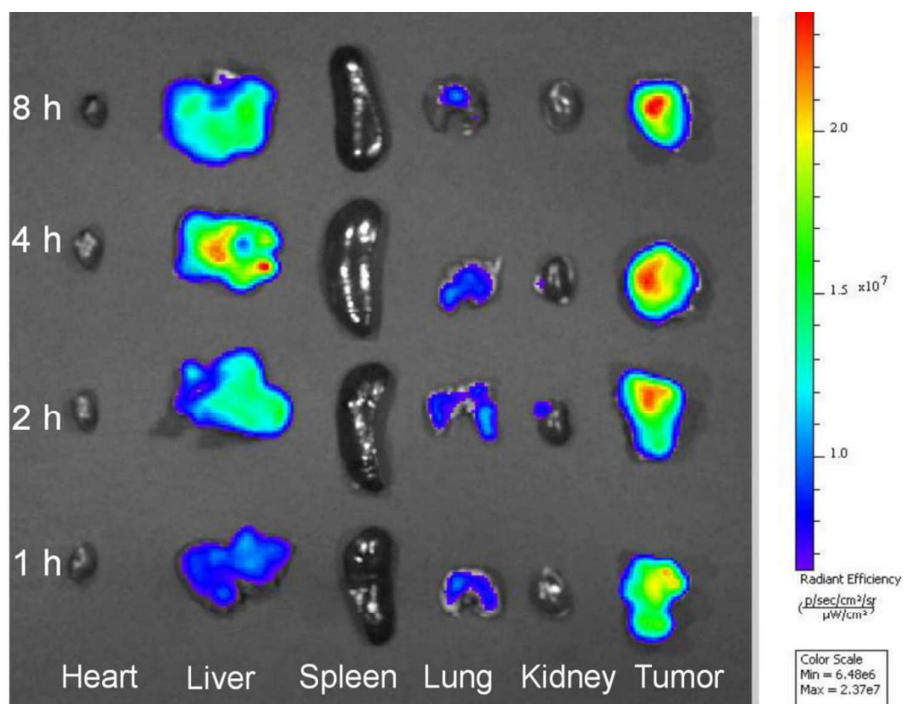

**Figure S9.** *Ex vivo* fluorescence imaging of heart, liver, spleen, lung, kidney and tumor 1 h, 2 h, 4 h and 8 h after PCCN treatment.

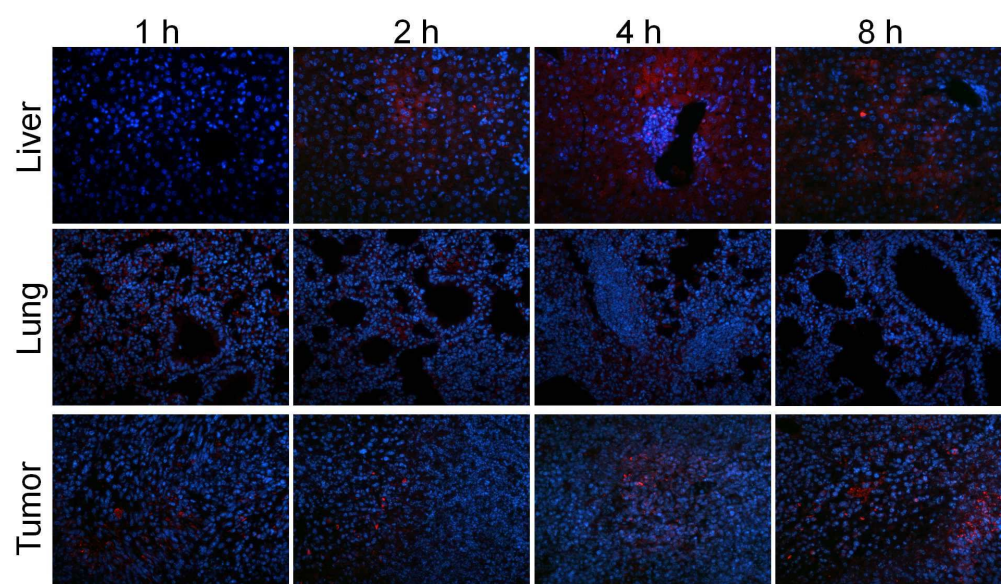

**Figure S10.** *Ex vivo* CLSM imaging of liver, lung and tumor 1 h, 2 h, 4 h and 8 h after PCCN treatment.

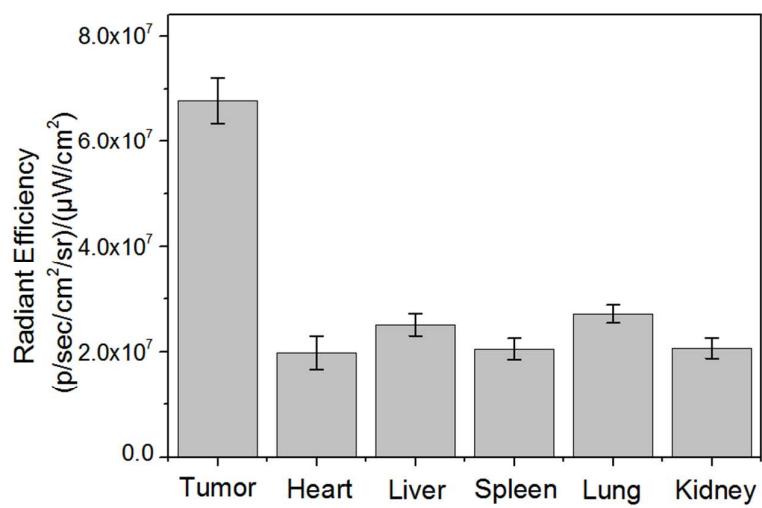

**Figure S11.** Quantitative analysis of PCCN fluorescence in tumor, liver, heart, lung and kidney 48 h post-injection.

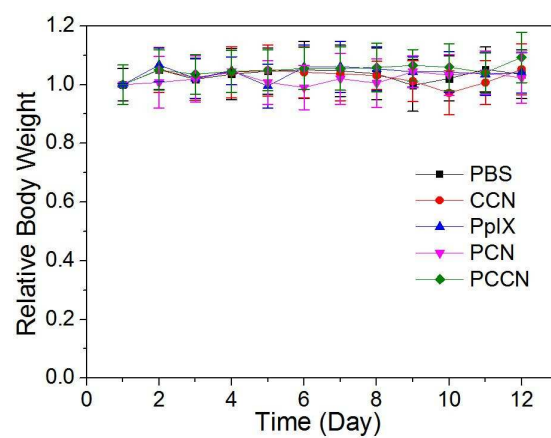

**Figure S12.** Relative body weight of PCCN, PCN, CCN and  $C_3N_4$  treated mice.



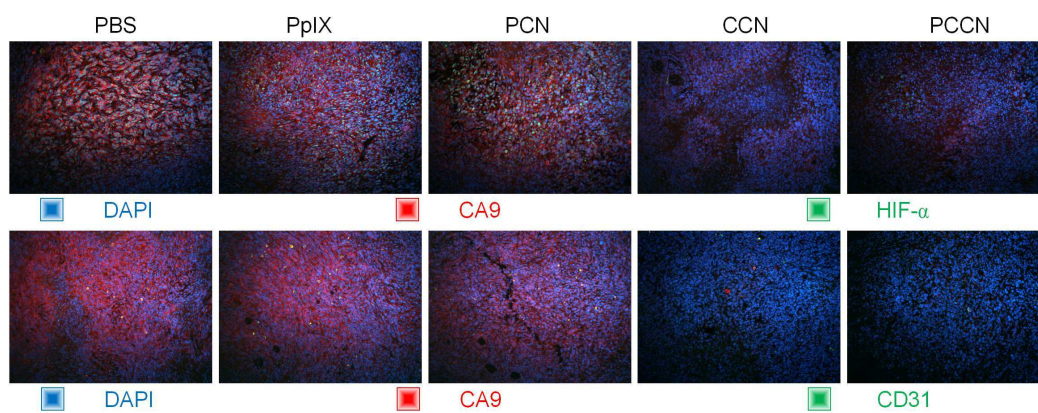

**Figure S13.** (a) Immunofluorescence images of HIF- $\alpha$ , CA9 and CD31 of tumors after 12 days of treatment with PBS, PpIX, CCN and PCCN.

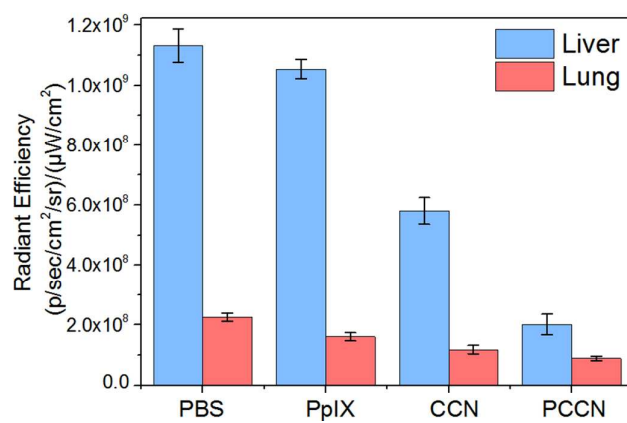

**Figure S14.** Quantitative analysis of lung and liver metastasis after PBS, PpIX, CCN and PCCN treatments.
